# Supplementary material for: Controlling quantum-beating signals in 2D electronic spectra by packing synthetic heterodimers on single-walled carbon nanotubes
Source: Springer Nature journal article supplement (doi:10.1038/nchem.2729), 2017-02-21
Supplement: 41557_2017_BFnchem2729_MOESM85_ESM.mol [file 41557_2017_BFnchem2729_MOESM85_ESM.mol]

nchem.2729-compD24.mol
  ChemDraw02011711202D

 75 83  0  0  0  0  0  0  0  0999 V2000
   -3.6983   -2.0625    0.0000 C   0  0  0  0  0  0  0  0  0  0  0  0
   -3.6983   -2.8875    0.0000 C   0  0  0  0  0  0  0  0  0  0  0  0
   -2.9838   -3.3000    0.0000 C   0  0  0  0  0  0  0  0  0  0  0  0
   -2.2693   -2.8875    0.0000 C   0  0  0  0  0  0  0  0  0  0  0  0
   -2.2693   -2.0625    0.0000 C   0  0  0  0  0  0  0  0  0  0  0  0
   -2.9838   -1.6500    0.0000 C   0  0  0  0  0  0  0  0  0  0  0  0
   -1.5549   -3.3000    0.0000 C   0  0  0  0  0  0  0  0  0  0  0  0
   -0.8404   -2.8875    0.0000 C   0  0  0  0  0  0  0  0  0  0  0  0
   -0.8404   -2.0625    0.0000 C   0  0  0  0  0  0  0  0  0  0  0  0
   -1.5549   -1.6500    0.0000 O   0  0  0  0  0  0  0  0  0  0  0  0
   -0.1259   -3.3000    0.0000 C   0  0  0  0  0  0  0  0  0  0  0  0
    0.5885   -2.8875    0.0000 C   0  0  0  0  0  0  0  0  0  0  0  0
    0.5885   -2.0625    0.0000 C   0  0  0  0  0  0  0  0  0  0  0  0
   -0.1259   -1.6500    0.0000 C   0  0  0  0  0  0  0  0  0  0  0  0
   -1.5549   -4.1250    0.0000 C   0  0  0  0  0  0  0  0  0  0  0  0
   -2.2693   -4.5375    0.0000 C   0  0  0  0  0  0  0  0  0  0  0  0
   -2.2693   -5.3625    0.0000 C   0  0  0  0  0  0  0  0  0  0  0  0
   -1.5549   -5.7750    0.0000 C   0  0  0  0  0  0  0  0  0  0  0  0
   -0.8404   -5.3625    0.0000 C   0  0  0  0  0  0  0  0  0  0  0  0
   -0.8404   -4.5375    0.0000 C   0  0  0  0  0  0  0  0  0  0  0  0
    1.3030   -1.6500    0.0000 O   0  0  0  0  0  0  0  0  0  0  0  0
   -4.4128   -1.6500    0.0000 O   0  0  0  0  0  0  0  0  0  0  0  0
   -4.4128   -3.3000    0.0000 C   0  0  0  0  0  0  0  0  0  0  0  0
    1.3030   -3.3000    0.0000 C   0  0  0  0  0  0  0  0  0  0  0  0
   -4.4128   -0.8250    0.0000 C   0  0  0  0  0  0  0  0  0  0  0  0
   -3.6983   -0.4125    0.0000 C   0  0  0  0  0  0  0  0  0  0  0  0
   -2.9838   -0.8250    0.0000 C   0  0  0  0  0  0  0  0  0  0  0  0
   -0.1259   -0.8250    0.0000 C   0  0  0  0  0  0  0  0  0  0  0  0
    0.5885   -0.4125    0.0000 N   0  0  0  0  0  0  0  0  0  0  0  0
    1.3030   -0.8250    0.0000 C   0  0  0  0  0  0  0  0  0  0  0  0
    2.0175   -0.4125    0.0000 C   0  0  0  0  0  0  0  0  0  0  0  0
    2.0175    0.4125    0.0000 N   0  0  0  0  0  0  0  0  0  0  0  0
    1.3030    0.8250    0.0000 C   0  0  0  0  0  0  0  0  0  0  0  0
    0.5885    0.4125    0.0000 C   0  0  0  0  0  0  0  0  0  0  0  0
    2.7320    0.8250    0.0000 C   0  0  0  0  0  0  0  0  0  0  0  0
    2.7320    1.6500    0.0000 C   0  0  0  0  0  0  0  0  0  0  0  0
    3.4464    2.0625    0.0000 C   0  0  0  0  0  0  0  0  0  0  0  0
    3.4464    2.8875    0.0000 C   0  0  0  0  0  0  0  0  0  0  0  0
    2.7320    3.3000    0.0000 C   0  0  0  0  0  0  0  0  0  0  0  0
    2.0175    2.8875    0.0000 C   0  0  0  0  0  0  0  0  0  0  0  0
    2.0175    2.0625    0.0000 C   0  0  0  0  0  0  0  0  0  0  0  0
    1.3030    3.3000    0.0000 C   0  0  0  0  0  0  0  0  0  0  0  0
    0.5885    2.8875    0.0000 C   0  0  0  0  0  0  0  0  0  0  0  0
    0.5885    2.0625    0.0000 C   0  0  0  0  0  0  0  0  0  0  0  0
    1.3030    1.6500    0.0000 O   0  0  0  0  0  0  0  0  0  0  0  0
   -0.1259    3.3000    0.0000 C   0  0  0  0  0  0  0  0  0  0  0  0
   -0.8404    2.8875    0.0000 C   0  0  0  0  0  0  0  0  0  0  0  0
   -0.8404    2.0625    0.0000 C   0  0  0  0  0  0  0  0  0  0  0  0
   -0.1259    1.6500    0.0000 C   0  0  0  0  0  0  0  0  0  0  0  0
    1.3030    4.1222    0.0000 C   0  0  0  0  0  0  0  0  0  0  0  0
    4.1609    1.6500    0.0000 O   0  0  0  0  0  0  0  0  0  0  0  0
    2.0175    4.5375    0.0000 C   0  0  0  0  0  0  0  0  0  0  0  0
    2.0175    5.3625    0.0000 C   0  0  0  0  0  0  0  0  0  0  0  0
    1.3030    5.7750    0.0000 C   0  0  0  0  0  0  0  0  0  0  0  0
    0.5885    5.3625    0.0000 C   0  0  0  0  0  0  0  0  0  0  0  0
    0.5885    4.5375    0.0000 C   0  0  0  0  0  0  0  0  0  0  0  0
   -1.5549    1.6500    0.0000 O   0  0  0  0  0  0  0  0  0  0  0  0
   -0.1259    0.8250    0.0000 C   0  0  0  0  0  0  0  0  0  0  0  0
   -0.8404    0.4125    0.0000 C   0  0  0  0  0  0  0  0  0  0  0  0
   -1.5549    0.8250    0.0000 C   0  0  0  0  0  0  0  0  0  0  0  0
    2.8272    4.3947    0.0000 C   0  0  0  0  0  0  0  0  0  0  0  0
    3.1094    3.6195    0.0000 O   0  0  0  0  0  0  0  0  0  0  0  0
    3.3557    5.0246    0.0000 O   0  0  0  0  0  0  0  0  0  0  0  0
    3.0745    5.7972    0.0000 C   0  0  0  0  0  0  0  0  0  0  0  0
    3.6030    6.4271    0.0000 C   0  0  0  0  0  0  0  0  0  0  0  0
    4.4128    6.2843    0.0000 C   0  0  0  0  0  0  0  0  0  0  0  0
    4.1609    3.3000    0.0000 Cl  0  0  0  0  0  0  0  0  0  0  0  0
   -1.5549    3.3000    0.0000 Cl  0  0  0  0  0  0  0  0  0  0  0  0
   -0.1259    5.7750    0.0000 Cl  0  0  0  0  0  0  0  0  0  0  0  0
    1.3030    6.6000    0.0000 Cl  0  0  0  0  0  0  0  0  0  0  0  0
   -2.9838   -5.7750    0.0000 Cl  0  0  0  0  0  0  0  0  0  0  0  0
   -1.5549   -6.6000    0.0000 Cl  0  0  0  0  0  0  0  0  0  0  0  0
   -0.1259   -4.1250    0.0000 C   0  0  0  0  0  0  0  0  0  0  0  0
   -0.1259   -3.3028    0.0000 O   0  0  0  0  0  0  0  0  0  0  0  0
    0.5861   -4.5361    0.0000 O   0  0  0  0  0  0  0  0  0  0  0  0
 73 74  2  0      
 73 75  1  0      
 20 73  1  0      
  1  2  1  0      
  2  3  2  0      
  3  4  1  0      
  4  5  2  0      
  5  6  1  0      
  6  1  2  0      
  4  7  1  0      
  7  8  2  0      
  8  9  1  0      
  9 10  1  0      
 10  5  1  0      
  8 11  1  0      
 11 12  2  0      
 12 13  1  0      
 13 14  1  0      
 14  9  2  0      
  7 15  1  0      
 15 16  2  0      
 16 17  1  0      
 17 18  2  0      
 18 19  1  0      
 19 20  2  0      
 20 15  1  0      
 13 21  2  0      
  1 22  1  0      
  2 23  1  0      
 12 24  1  0      
 25 26  2  0      
 26 27  1  0      
 27  6  1  0      
 14 28  1  0      
 28 29  1  0      
 29 30  1  0      
 30 31  1  0      
 31 32  1  0      
 32 33  1  0      
 33 34  1  0      
 34 29  1  0      
 32 35  1  0      
 35 36  1  0      
 36 37  1  0      
 37 38  1  0      
 38 39  2  0      
 39 40  1  0      
 40 41  1  0      
 41 36  2  0      
 40 42  2  0      
 42 43  1  0      
 43 44  2  0      
 44 45  1  0      
 45 41  1  0      
 43 46  1  0      
 46 47  2  0      
 47 48  1  0      
 48 49  2  0      
 49 44  1  0      
 42 50  1  0      
 37 51  2  0      
 50 52  2  0      
 52 53  1  0      
 53 54  2  0      
 54 55  1  0      
 55 56  2  0      
 56 50  1  0      
 48 57  1  0      
 49 58  1  0      
 58 59  1  0      
 59 60  2  0      
 52 61  1  0      
 61 62  2  0      
 61 63  1  0      
 63 64  1  0      
 64 65  1  0      
 65 66  2  0      
 38 67  1  0      
 47 68  1  0      
 55 69  1  0      
 54 70  1  0      
 17 71  1  0      
 18 72  1  0      
M  STY  1   1 SUP
M  SLB  1   1   1
M  SAL   1  3  73  74  75
M  SBL   1  1   3
M  SMT   1 CO2H
M  SBV   1   3   -0.7145   -0.4125
M  END
